# Supplementary material for: Detection of Nuclear Protein Profile Changes by Human Metapneumovirus M2-2 Protein Using Quantitative Differential Proteomics
Source: PubMed Central journal article supplement (PMC5748611; doi:10.3390/vaccines5040045), 2017-12-03
Supplement: vaccines-05-00045-s001.pdf [file vaccines-05-00045-s001.pdf]

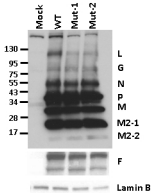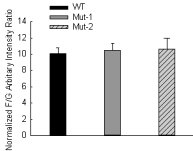

Figure S1.

**Cyto**

**Nucleus**

Mock

HSV

Mock

HSV

Lamin B

NOS1

| WT/mock      | Mut-1/mock   | Mut-2/mock   |                |
|--------------|--------------|--------------|----------------|
| <b>0.771</b> | 0.921        | 0.898        | <b>GTF3C2</b>  |
| <b>0.824</b> | 0.944        | 0.983        | <b>MED8</b>    |
| <b>0.834</b> | 0.907        | 1.067        | <b>SMARCA1</b> |
| <b>0.837</b> | 0.984        | 1.028        | <b>CARF</b>    |
| 0.850        | 1.048        | 0.963        | NFYC           |
| 0.858        | 0.931        | 1.005        | TRRAP          |
| 0.906        | 0.976        | 0.944        | SUPT5H         |
| 0.908        | 0.910        | 0.938        | GTF2I          |
| 0.930        | 0.907        | 0.878        | TRIM28         |
| 0.946        | <b>1.153</b> | <b>1.379</b> | <b>GTF3C4</b>  |
| 0.961        | 0.997        | 1.019        | SMARCA2        |
| 0.967        | 0.965        | 0.903        | GTF2H4         |
| 0.987        | 0.928        | 0.898        | YY1            |
| 0.996        | 0.930        | 0.952        | SLTM           |
| 0.998        | 0.948        | 0.943        | TCERG1         |
| 1.007        | 0.946        | 0.929        | BTF3           |
| 1.019        | 0.875        | 0.904        | UBTF           |
| 1.026        | 1.013        | 0.929        | GTF3C1         |
| 1.029        | 0.992        | 0.980        | GTF3C3         |
| 1.031        | 1.012        | 1.036        | MED11          |
| 1.040        | <b>1.192</b> | <b>1.205</b> | <b>STAT1</b>   |
| 1.111        | 1.100        | 0.939        | CTCF           |
| 1.124        | 0.874        | <b>1.181</b> | <b>BCLAF1</b>  |
| 1.129        | 1.058        | 0.952        | TAF8           |
| <b>1.424</b> | 0.925        | <b>0.613</b> | <b>NFYB</b>    |

**Set 1**

|        |                       |
|--------|-----------------------|
| P16403 | Histone H1.2 HIST1H1C |
| P16402 | Histone H1.3 HIST1H1D |
| P10412 | Histone H1.4 HIST1H1E |
| Q92522 | Histone H1x H1FX      |

|        |                                |
|--------|--------------------------------|
| Q71UI9 | Histone H2A.V H2AFV            |
| Q8IUE6 | Histone H2A type 2-B HIST2H2AB |
| U3KQK0 | Histone H2B HIST1H2BN          |
| P33778 | Histone H2B type 1-B HIST1H2BB |

|        |                       |
|--------|-----------------------|
| P68431 | Histone H3.1 HIST1H3A |
| Q16695 | Histone H3.1t HIST3H3 |
| Q71DI3 | Histone H3.2 HIST2H3A |
| P84243 | Histone H3.3 H3F3A    |

|        |                     |
|--------|---------------------|
| P62805 | Histone H4 HIST1H4A |
|--------|---------------------|

**Set 2**

| Score   | Coverage | WT    | Mut-1 | Mut-2 |
|---------|----------|-------|-------|-------|
| 3016.70 | 100.00   | 0.865 | 0.827 | 0.839 |
| 2877.30 | 92.31    | 0.943 | 0.893 | 0.872 |
| 3175.00 | 100.00   | 0.909 | 0.900 | 0.847 |
| 566.19  | 97.65    | 0.990 | 0.990 | 0.998 |

|         |        |       |       |       |
|---------|--------|-------|-------|-------|
| 301.46  | 97.66  | 0.980 | 1.867 | 1.407 |
| 704.55  | 93.08  | 1.298 | 1.265 | 1.186 |
| 1267.13 | 87.95  | 1.174 | 2.265 | 1.699 |
| 1190.07 | 100.00 | 1.184 | 2.001 | 1.499 |

|        |       |       |       |       |
|--------|-------|-------|-------|-------|
| 346.26 | 88.24 | 0.911 | 1.517 | 1.449 |
| 325.08 | 88.24 | 0.986 | 1.611 | 1.222 |
| 473.92 | 88.24 | 1.136 | 1.952 | 1.484 |
| 433.65 | 88.24 | 1.043 | 1.738 | 1.273 |

|        |        |       |       |       |
|--------|--------|-------|-------|-------|
| 737.96 | 100.00 | 1.400 | 2.829 | 1.901 |
|--------|--------|-------|-------|-------|

| Score   | Coverage | WT    | Mut-1 | Mut-2 |
|---------|----------|-------|-------|-------|
| 2431.89 | 99.06    | 0.977 | 0.884 | 0.865 |
| 2287.59 | 99.10    | 0.952 | 0.916 | 0.943 |
| 2588.09 | 99.09    | 1.006 | 0.915 | 0.834 |
| 464.44  | 100.00   | 1.010 | 0.988 | 1.024 |

|        |       |       |       |       |
|--------|-------|-------|-------|-------|
| 248.72 | 82.03 | 1.238 | 1.870 | 1.422 |
| 326.12 | 94.62 | 1.242 | 1.323 | 1.243 |
| 936.64 | 87.95 | 1.224 | 2.126 | 1.679 |
| 878.92 | 97.62 | 1.210 | 1.840 | 1.388 |

|        |       |       |       |       |
|--------|-------|-------|-------|-------|
| 250.65 | 90.44 | 1.047 | 1.419 | 1.282 |
| 236.19 | 90.44 | 1.084 | 1.835 | 1.381 |
| 353.05 | 90.44 | 1.075 | 2.042 | 1.456 |
| 332.29 | 97.06 | 1.146 | 1.756 | 1.340 |

|        |       |       |       |       |
|--------|-------|-------|-------|-------|
| 550.10 | 95.15 | 1.478 | 2.774 | 1.985 |
|--------|-------|-------|-------|-------|

| Biological Function                         | Analysis Name                 | p-value           | Molecules                                                                                                                               | # of proteins |
|---------------------------------------------|-------------------------------|-------------------|-----------------------------------------------------------------------------------------------------------------------------------------|---------------|
| Cellular Assembly and Organization          | Mu1 vs. Mock1 & Mu1 vs. Mock2 | 4.15E-13-4.33E-02 | CCT2,CCT3,CCT4,CCT5,CCT6A,CCT7,CCT8,GAPDH,GNBL1,HST3H3,MYOF,NUP155,SUPT16H,TCPI,SET,BASP1,FAM109B,HMGON1,HMG81                          | 20            |
|                                             | Mu2 vs. Mock1 & Mu2 vs. Mock2 | 5.13E-06-8.85E-02 | ANKA1,CCT3,CCT5,CCT6A,CCT7,CCT8,EEF1A1,GAPDH,HST3H3,KRT3,MYOF,PLXNB1,SLC25A5,SRP1,SUPT16H,HST1H1C,NPM1                                  | 17            |
| Cell-To-Cell Signaling and Interaction      | Mu1 vs. Mock1 & Mu1 vs. Mock2 | 1.87E-12-4.65E-02 | CCT2,CCT3,CCT4,CCT5,CCT6A,CCT7,CCT8,CNN2,GNB1,MYOF,PLXNB1,HMG81                                                                         | 13            |
|                                             | Mu2 vs. Mock1 & Mu2 vs. Mock2 | 1.04E-05-4.51E-02 | ANKA1,CCT3,CCT5,CCT6A,CCT7,GAPDH,KRT3,MYOF,OASL,PLXNB1,NPM1,PAWR                                                                        | 12            |
| Cell Death and Survival                     | Mu1 vs. Mock1 & Mu1 vs. Mock2 | 1.78E-09-4.65E-02 | ATPSA1,CCT2,CCT3,CCT4,CCT5,CCT6A,CCT7,CCT8,CNN2,EIF6,GAPDH,GNBL1,MYOF,ORC2,SET,SNR1,TCPI,USP10,BASP1,CHTOP,HDOF,HMG81,PGBP1,PRDX1       | 24            |
|                                             | Mu2 vs. Mock1 & Mu2 vs. Mock2 | 7.41E-05-4.74E-02 | ANKA1,BCLAF1,CCT3,CCT5,CCT6A,CCT7,EEF1A1,GAPDH,GAPD,KRT10,MYOF,PLXNB1,PRDX1,SET,SLC25A5,SRP1,TPT1,HDOF,NPM1,PAWR                        | 20            |
| Cellular Movement                           | Mu1 vs. Mock1 & Mu1 vs. Mock2 | 7.21E-05-4.65E-02 | CNN2,GNBL1,HDOF,HMG81,HMG83                                                                                                             | 5             |
|                                             | Mu2 vs. Mock1 & Mu2 vs. Mock2 | 4.45E-04-4.55E-02 | ANKA1,PLXNB1,PRDX1,SRP1,HDOF,NPM1                                                                                                       | 6             |
| Cell Morphology                             | Mu1 vs. Mock1 & Mu1 vs. Mock2 | 2.36E-04-4.65E-02 | CNN2,GNBL1,SET,BASP1,CHTOP,DPY30,ERH,HMG81,PRDX1                                                                                        | 9             |
|                                             | Mu2 vs. Mock1 & Mu2 vs. Mock2 | 3.1E-03-3.36E-02  | ANKA1,KRT2,PLXNB1,PRDX1,DPY30,NCOR1,NPM1                                                                                                | 7             |
| Cellular Growth and Proliferation           | Mu1 vs. Mock1 & Mu1 vs. Mock2 | 6.16E-04-4.65E-02 | ATPSA1,ATPSB,ATPSG1,CCT2,CCT3,CCT5,CCT7,CNN2,EIF6,GAPDH,GNBL1,MYOF,NAP1L1,SET,SNR1,TCPI,USP10,BASP1,DPY30,HDOF,HMG81,HMG83,HMGON1,PRDX1 | 24            |
|                                             | Mu2 vs. Mock1 & Mu2 vs. Mock2 | 3.1E-03-4.27E-02  | ATPSG1,ANKA1,BCLAF1,CCT3,CCT5,CCT7,EEF1A1,GAPDH,GAPD,KRT3,KRT10,MYOF,NAP1L1,PLXNB1,PRDX1,SET,SLC25A5,TPT1,DPY30,HDOF,NCOR1,NPM1,PAWR    | 23            |
| Cell Cycle                                  | Mu1 vs. Mock1 & Mu1 vs. Mock2 | 3.4E-03-4.65E-02  | BANF1,CCT4,GNBL1,ORC2,SUPT16H,TCPI,HMG81,HMGON1                                                                                         | 8             |
|                                             | Mu2 vs. Mock1 & Mu2 vs. Mock2 | 4.45E-04-4.85E-02 | BANF1,SRP1,SUPT16H,NPM1,PAWR                                                                                                            | 5             |
| Cellular Function and Maintenance           | Mu1 vs. Mock1 & Mu1 vs. Mock2 | 3.4E-03-4.65E-02  | MYOF,NUP155,HMG81,HMGON1,PRDX1                                                                                                          | 5             |
|                                             | Mu2 vs. Mock1 & Mu2 vs. Mock2 | 2.93E-03-4.85E-02 | ANKA1,GAPDH,KRT3,MYOF,PLXNB1,PRDX1,SRP1,NPM1                                                                                            | 8             |
| Molecular Transport                         | Mu1 vs. Mock1 & Mu1 vs. Mock2 | 3.4E-03-4.54E-02  | ATPSB,ATPSL,GAPDH,GNBL1,NUP155,SET,SLC25A15,CHTOP,HMG81                                                                                 | 9             |
|                                             | Mu2 vs. Mock1 & Mu2 vs. Mock2 | 6.12E-04-4.55E-02 | ANKA1,EEF1A1,GAPDH,GAPD,PRDX1,SET,SLC25A5,TPT1,DPY30,PAWR                                                                               | 10            |
| Organ Morphology                            | Mu1 vs. Mock1 & Mu1 vs. Mock2 | 3.4E-03-3.31E-02  | MYOF,HDOF,HMG81                                                                                                                         | 3             |
|                                             | Mu2 vs. Mock1 & Mu2 vs. Mock2 | 3.1E-03-4.85E-02  | ANKA1,BCLAF1,GAPD,MTFSD2,MYOF,HDOF,NCOR1,NPM1                                                                                           | 8             |
| Energy Production                           | Mu1 vs. Mock1 & Mu1 vs. Mock2 | 4.34E-08-4.65E-02 | ATPSA1,ATPSB,ATPSG1,ATPSG1,ATPSL,CCT4,CCT5,HMG81                                                                                        | 6             |
|                                             | Mu2 vs. Mock1 & Mu2 vs. Mock2 | 3.11E-03-3.64E-03 | ATPSG1,ATPSG1,SLC25A5                                                                                                                   | 3             |
| Nucleic Acid Metabolism                     | Mu1 vs. Mock1 & Mu1 vs. Mock2 | 4.34E-08-2.68E-02 | ATPSA1,ATPSB,ATPSG1,ATPSG1,ATPSL,CCT4,CCT5,GAPDH,SET,ERH,HMG81,HMGON1                                                                   | 12            |
|                                             | Mu2 vs. Mock1 & Mu2 vs. Mock2 | 6.12E-04-3.36E-02 | ATPSG1,ATPSG1,EEF1A1,ERH,GAPDH,GAPD,SET,SLC25A5,TPT1                                                                                    | 9             |
| Small Molecule Biochemistry                 | Mu1 vs. Mock1 & Mu1 vs. Mock2 | 4.34E-08-4.65E-02 | ATPSA1,ATPSB,ATPSG1,ATPSG1,ATPSL,CCT4,CCT5,EIF6,GAPDH,GNBL1,SET,ERH,HMG81,HMGON1,PRDX1                                                  | 15            |
|                                             | Mu2 vs. Mock1 & Mu2 vs. Mock2 | 6.12E-04-4.55E-02 | ATPSG1,ATPSG1,ANKA1,EEF1A1,ERH,GAPDH,GAPD,MTFSD2,PRDX1,SET,SLC25A5,TPT1,NCOR1,PAWR                                                      | 14            |
| DNA Replication, Recombination, and Repair  | Mu1 vs. Mock1 & Mu1 vs. Mock2 | 2.12E-05-4E-02    | BANF1,CCT4,CCT5,HST3H3,NAP1L1,ORC2,SET,SUPT16H,ERH,HDOF,HMG81,HMGON1                                                                    | 12            |
|                                             | Mu2 vs. Mock1 & Mu2 vs. Mock2 | 2.11E-03-3.96E-02 | BANF1,ERH,GAPD,HST3H3,NAP1L1,PRDX1,SET,SRP1,SUPT16H,HDOF,NPM1,PAWR                                                                      | 12            |
| Carbohydrate Metabolism                     | Mu1 vs. Mock1 & Mu1 vs. Mock2 | 3.4E-03-3.24E-02  | GAPDH,HMG81                                                                                                                             | 2             |
|                                             | Mu2 vs. Mock1 & Mu2 vs. Mock2 | 3.1E-03-2.99E-02  | EEF1A1,GAPDH,GAPD                                                                                                                       | 3             |
| Lipid Metabolism                            | Mu1 vs. Mock1 & Mu1 vs. Mock2 | 3.4E-03-4.65E-02  | HMG81                                                                                                                                   | 1             |
|                                             | Mu2 vs. Mock1 & Mu2 vs. Mock2 | 3.1E-03-4.55E-02  | ANKA1,EEF1A1                                                                                                                            | 2             |
| Post-Translational Modification             | Mu1 vs. Mock1 & Mu1 vs. Mock2 | 3.4E-03-4.65E-02  | CCT4,GNBL1,TCPI,PRDX1                                                                                                                   | 4             |
|                                             | Mu2 vs. Mock1 & Mu2 vs. Mock2 | 4.26E-02-4.26E-02 | ANKA1                                                                                                                                   | 1             |
| Protein Folding                             | Mu1 vs. Mock1 & Mu1 vs. Mock2 | 3.4E-03-3.91E-02  | CCT4,TCPI                                                                                                                               | 2             |
|                                             | Mu2 vs. Mock1 & Mu2 vs. Mock2 | 6.29E-03-3.02E-02 | HMG81                                                                                                                                   | 1             |
| Protein Synthesis                           | Mu1 vs. Mock1 & Mu1 vs. Mock2 | 6.79E-03-4.85E-02 | ANKA1,EEF1A1,GAPDH,GAPD,PRDX1,NPM1                                                                                                      | 6             |
|                                             | Mu2 vs. Mock1 & Mu2 vs. Mock2 | 6.78E-03-3.67E-02 | SLC25A19                                                                                                                                | 1             |
| Amino Acid Metabolism                       | Mu1 vs. Mock1 & Mu1 vs. Mock2 | 3.66E-02-3.66E-02 | MTFSD2                                                                                                                                  | 1             |
|                                             | Mu2 vs. Mock1 & Mu2 vs. Mock2 | 8.16E-03-8.16E-03 | NUP155,CHTOP                                                                                                                            | 2             |
| RNA Trafficking                             | Mu1 vs. Mock1 & Mu1 vs. Mock2 | 8.56E-03-4.65E-02 | PGBP1,RBMX,SNRPF                                                                                                                        | 3             |
|                                             | Mu2 vs. Mock1 & Mu2 vs. Mock2 | 9.27E-03-1.93E-02 | NPM1,RP26                                                                                                                               | 2             |
| Cell Signaling                              | Mu1 vs. Mock1 & Mu1 vs. Mock2 | 1.89E-02-4.54E-02 | GNBL1,SET,HMG81,PRDX1                                                                                                                   | 4             |
|                                             | Mu2 vs. Mock1 & Mu2 vs. Mock2 | 3.1E-03-3.36E-02  | BANF1,EEF1A1,MCU2,OASL,SET                                                                                                              | 5             |
| Inflammatory Disease                        | Mu1 vs. Mock1 & Mu1 vs. Mock2 | 5.61E-03-4.65E-02 | GAPDH,SNR1,ERH,HMG81,LDMB,PRDX1                                                                                                         | 6             |
|                                             | Mu2 vs. Mock1 & Mu2 vs. Mock2 | 3.8E-04-4.65E-02  | ATPSG1,ANKA1,EEF1A1,GAPDH,KRT3,PRDX1                                                                                                    | 6             |
| Free Radical Scavenging                     | Mu1 vs. Mock1 & Mu1 vs. Mock2 | 3.4E-03-3.34E-02  | PRDX1                                                                                                                                   | 1             |
|                                             | Mu2 vs. Mock1 & Mu2 vs. Mock2 | 3.1E-03-3.06E-02  | GAPD,PRDX1,DPY30                                                                                                                        | 3             |
| Gene Expression                             | Mu1 vs. Mock1 & Mu1 vs. Mock2 | 3.4E-03-2.87E-02  | CCT2,GAPDH,GNBL1,NAP1L1,SET,SNR1,SUPT16H,HMG81,HMGON1,PRDX1                                                                             | 10            |
|                                             | Mu2 vs. Mock1 & Mu2 vs. Mock2 | 3.1E-03-4.85E-02  | GAPDH,GAPD,PRDX1,SET,SRP1,SUPT16H,NCOR1,NPM1                                                                                            | 8             |
| Immune Cell Trafficking                     | Mu1 vs. Mock1 & Mu1 vs. Mock2 | 3.4E-03-3.68E-02  | CNN2,HMG81                                                                                                                              | 2             |
|                                             | Mu2 vs. Mock1 & Mu2 vs. Mock2 | 3.1E-03-3.66E-02  | ANKA1,PRDX1,NPM1                                                                                                                        | 3             |
| Respiratory Disease                         | Mu1 vs. Mock1 & Mu1 vs. Mock2 | 3.4E-03-3.34E-02  | DNAH1,GAPDH,SNR1,HMG81,PRDX1                                                                                                            | 5             |
|                                             | Mu2 vs. Mock1 & Mu2 vs. Mock2 | 1.22E-04-3.02E-02 | ANKA1,DNAH1,EEF1A1,GAPDH,KRT3,KRT10,PLXNB1,PRDX1,TPT1,ANKA2,HST1H1C,RP26                                                                | 12            |
| Immunological Disease                       | Mu1 vs. Mock1 & Mu1 vs. Mock2 | 5.61E-03-3.76E-02 | GAPDH,SNR1,ERH,HMG81,LDMB,PRDX1                                                                                                         | 6             |
|                                             | Mu2 vs. Mock1 & Mu2 vs. Mock2 | 1.5E-04-2.6E-02   | ATPSG1,ANKA1,EEF1A1,GAPDH,KRT3,PRDX1,NPM1                                                                                               | 7             |
| Inflammatory Response                       | Mu1 vs. Mock1 & Mu1 vs. Mock2 | 2.36E-04-3.91E-02 | CNN2,GAPDH,HMG81,PRDX1                                                                                                                  | 4             |
|                                             | Mu2 vs. Mock1 & Mu2 vs. Mock2 | 3.8E-04-4.58E-02  | ANKA1,EEF1A1,GAPDH,KRT3,KRT10,PRDX1,NPM1                                                                                                | 7             |
| Respiratory System Development and Function | Mu1 vs. Mock1 & Mu1 vs. Mock2 | 3.4E-03-4E-02     | DPY30,HMG81                                                                                                                             | 2             |
|                                             | Mu2 vs. Mock1 & Mu2 vs. Mock2 | 1.05E-02-2.68E-02 | ATPSB,CCT2,CNN1T31,GAPDH,MYOF,NUP155,SUPT16H,HMG81,PRDX1,SNRPF                                                                          | 10            |
| Infectious Disease                          | Mu1 vs. Mock1 & Mu1 vs. Mock2 | 8.25E-05-4.52E-02 | ANKA1,BCLAF1,CNN1T31,EEF1A1,GAPDH,MYOF,OASL,SRP1,SUPT16H,TPT1,NPM1,PRDX1,RP26                                                           | 13            |
|                                             | Mu2 vs. Mock1 & Mu2 vs. Mock2 | 3.34E-02-3.91E-02 | HMG81                                                                                                                                   | 1             |
